# Supplementary material for: A nanowire-assembled Co3S4/Cu2S@carbon binary metal sulfide hybrid as a sodium-ion battery anode displaying high capacity and recoverable rate-performance
Source: Royal Society of Chemistry journal article supplement (doi:10.1039/d3cc03841f), 2023-01-01
Supplement: d3cc03841f1.pdf [file d3cc03841f1.pdf]

Electronic Supplementary Information (ESI) for Chemical Communications. This journal is  
(c) The Royal Society of Chemistry 2023.

Electronic Supplementary Information (ESI)

## **Nanowires-assembled Co<sub>3</sub>S<sub>4</sub>/Cu<sub>2</sub>S@carbon binary metal sulfide hybrid as sodium-ion battery anode displaying high capacity and recoverable rate-performance**

Jinyun Liu<sup>a,\*</sup>, Xiaofei Huang<sup>a</sup>, Rui Wang<sup>b,c</sup>, Tianli Han<sup>a</sup>, Huigang Zhang<sup>b,c</sup>

### **Experimental**

**Materials and reagents:** Chemicals: Co(NO<sub>3</sub>)<sub>2</sub>·6H<sub>2</sub>O, urea, ammonium fluoride (NH<sub>4</sub>F), ethanol (AR), thioacetamide (TAA), pyrrole, N-methylpyrrolidone (AR, NMP), and Cu(NO<sub>3</sub>)<sub>2</sub>·3H<sub>2</sub>O were obtained from Aladdin. All chemicals were used directly without further purification.

**Preparation of Co<sub>3</sub>S<sub>4</sub>/CuS precursors:** In a typical experiment, a mixture solution with 0.292 g of Co(NO<sub>3</sub>)<sub>2</sub>·6H<sub>2</sub>O, 0.18 g of urea, 0.056 g of NH<sub>4</sub>F, and 40 mL ethanol was prepared in a 100 mL beaker after magnetically stirring by an agitator for 30 min. Subsequently 0.2412 g of Cu(NO<sub>3</sub>)<sub>2</sub>·3H<sub>2</sub>O and 0.3756 g of thioacetamide were added. The obtained solution was transferred to a 50 mL polytetrafluoroethylene reaction autoclave in an oven and heated at 140 °C for 12 h. After cooling down to room temperature, the sample was washed several times with deionized water/ethanol, and dried at 60 °C for 12 h.

**Synthesis of Co<sub>3</sub>S<sub>4</sub>/CuS@polypyrrole (PPy):** 200 mg obtained Co<sub>3</sub>S<sub>4</sub>/CuS powder and 13 mg SDS were dispersed into 80 mL deionized water, followed by ultrasonic dispersion for 1 h, 40 μL pyrrole monomer sequentially adding to the magnetic stirring for another 1 h. Then 7 mL 0.1 M (NH<sub>4</sub>)<sub>2</sub>S<sub>2</sub>O<sub>8</sub> solution were added to the above solution. Keep mixing continuously at room temperature for 4 h to get black deposits. The resultant Co<sub>3</sub>S<sub>4</sub>/CuS@PPy was collected by centrifugation, washed and dried.

**Preparation of Co<sub>3</sub>S<sub>4</sub>/Cu<sub>2</sub>S@NC:** The Co<sub>3</sub>S<sub>4</sub>/CuS@PPy was putted at a quartz boat, and calcined at 400

°C for 8 h with a heat rate of 2.0 °C min<sup>-1</sup> under Ar/H<sub>2</sub> (95%/5%) atmosphere flow. After calcination, the nanoflower sphere Co<sub>3</sub>S<sub>4</sub>/Cu<sub>2</sub>S@NC were gained. In contrast, the pure Co<sub>3</sub>S<sub>4</sub>/Cu<sub>2</sub>S was produced by the same calcination process using Co<sub>3</sub>S<sub>4</sub>/CuS as the precursor.

**Materials characterization:** The phase of the sample was determined by using an X-ray diffractometer (XRD, SMART APEX II Brook, copper target). The morphology was observed by field emission scanning electron microscope (SEM, Hitachi S-8100), and transmission electron microscope (TEM, HT-7700, TecnaiG220S-Twin). A high-resolution TEM (HRTEM) was used to observe the lattice fringes. Energy dispersive X-ray spectroscopy (EDS) was employed for elemental mapping and studying the elemental distribution. X-ray photoelectron spectroscopy (XPS, EscalAB 250) and Raman spectroscopy (Renishaw in Via) were used for characterization. In order to characterize the carbon matrix, Raman spectroscopy (Renishaw in Via) was used. The mass content of carbon was determined by thermogravimetric analysis (TGA, Setaram Labsys Evo SDT Q600). Prior to the BET test, the sample was degassed at 120 °C for 12 h in vacuum to remove water adsorbed on the surface, and then physical adsorption isotherms (adsorption-desorption branch) were recorded using a specific surface area tester (ASAP Micromeritics Tristar 2460).

**Electrochemical measurements.** The 70 wt% active materials (Co<sub>3</sub>S<sub>4</sub>/Cu<sub>2</sub>S@NC), 20 wt% acetylene black and 10 wt% polyvinylidene fluoride (PVDF) were mixed in a ratio of 7:2:1. The *n*-methylpyrrolidone (NMP) was used as diluent to disperse the mixture. Evenly-mixed slurry was coated on a Cu foil with a thickness of 9 μm, dried in a vacuum oven at 80 °C for 24 h, and cut into 1.2 mm discs. The counter electrode was sodium, while the diaphragm was fiberglass. The mass loading of the anode was about 1.2 mg cm<sup>-2</sup>. The coin cells were assembled in an Ar-filled glovebox. Electrolyte contained 1 M Na<sub>5</sub>O<sub>3</sub>CF<sub>3</sub> dissolved in diethylene glycol dimethyl ether. The galvanostatical charge-discharge was tested on Neware Battery system. Cyclic voltammetry (CV, 0.1 mV s<sup>-1</sup> of sweep rate over the range of 0.2–3 V) and electrochemical impedance spectroscopy (EIS) measurements were performed on an electrochemical workstation (CHI 660E).

For the assembly of full batteries, the Na<sub>3</sub>V<sub>2</sub>(PO<sub>4</sub>)<sub>3</sub> (NVP) cathode was prepared by mixing homemade NVP, acetylene black and PVDF with a weight ratio of 8:1:1 in NMP to form a slurry, which was cast onto aluminum foil. The electrolyte was 1 M sodium hexafluorophosphate (NaPF<sub>6</sub>) in diethylene

glycol dimethyl ether.

**First-principle calculations:** Vienna Ab initio Simulation Package (VASP) was employed for the first-principle calculations. Structure optimization was accomplished by the Perdew-Burke-Ernzerhof exchange–correlation function under generalized gradient approximation and project-augmented wave atom potentials, where the Coulomb U and exchange J parameters were considered ( $U_{eff} = U - J$ ). To simulate the  $\text{Co}_3\text{S}_4/\text{Cu}_2\text{S}$  hybrid composite, a vacuum layer around 15 Å in the z direction was inserted to avoid the periodic effect. The primitive structures of CoS and  $\text{Cu}_2\text{S}$  were obtained from Material Project. During the optimization process, the cutoff energy of the plane-wave basis was set as 500 eV, and the structural optimization process stopped when an energy convergence was lower than  $10^{-5}$  eV and the atomic force was less than 0.01 eV/Å. Brillouin zone integration was performed using a  $3 \times 3 \times 1$  k-point mesh.

#### Equations:

Intercalation (discharge):

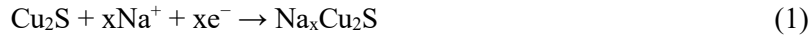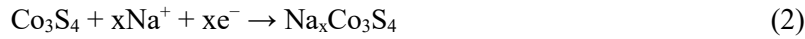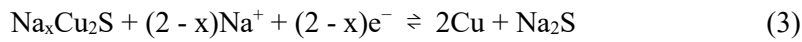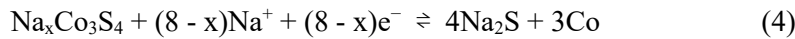

Deintercalation (charge):

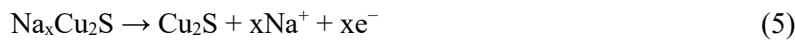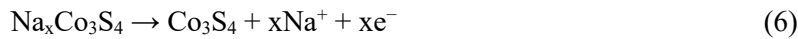

$$D_{\text{na}^+} = \frac{4}{\tau\pi} \left( \frac{n_m V_m}{S} \right)^2 \left( \frac{\partial E_S}{\partial E_\tau} \right)^2 \quad (7)$$

where  $\tau$  represents current pulse time (h),  $V_m$  shows molar volume of active material, S is electrode area,  $\Delta E_S$  indicates potential change between discharge pulse and open circuit state, and  $\Delta E_\tau$  stands for voltage change.

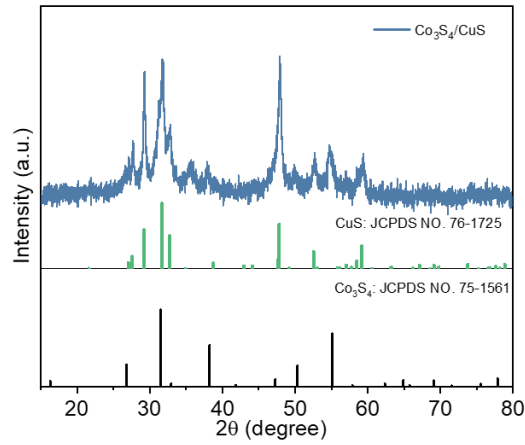

**Fig. S1** XRD patterns of  $\text{Co}_3\text{S}_4/\text{CuS}$ .

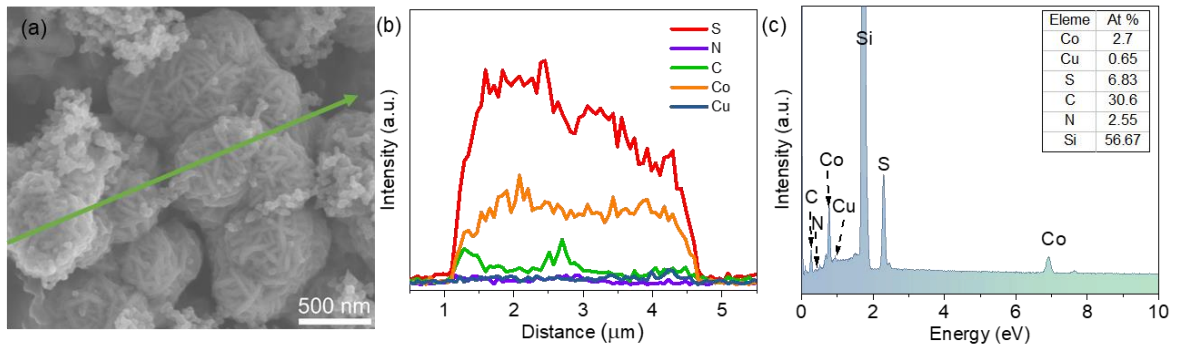

**Fig. S2** (a) SEM image, (b) line-scanning curves, and (c) EDS spectrum of  $\text{Co}_3\text{S}_4/\text{Cu}_2\text{S}@ \text{NC}$ .

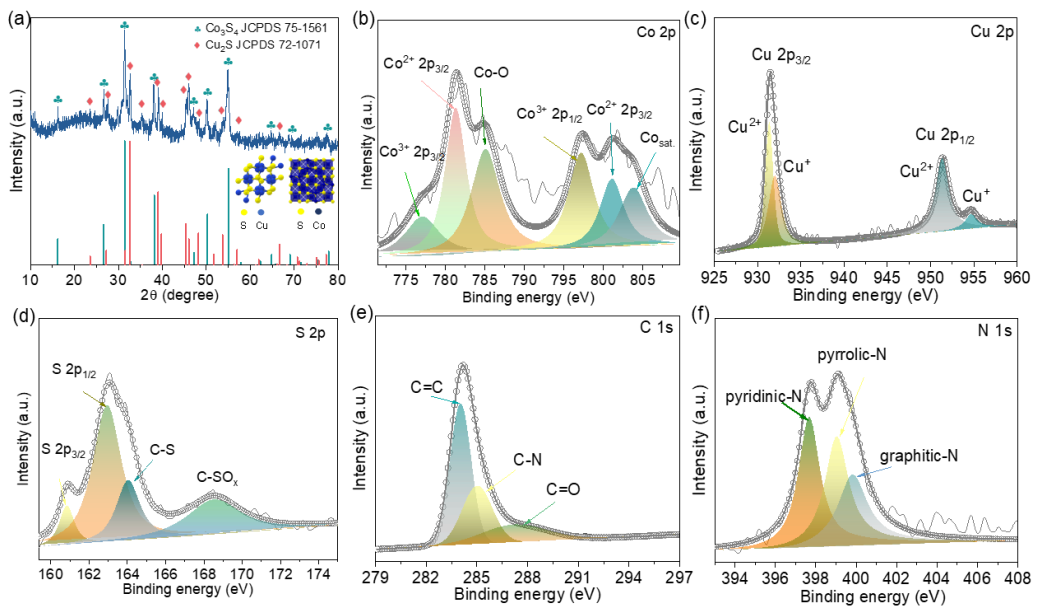

**Fig. S3** (a) XRD patterns, XPS spectra of (b) Co 2p, (c) Cu 2p, (d) S 2p, (e) C 1s, (f) N 1s.

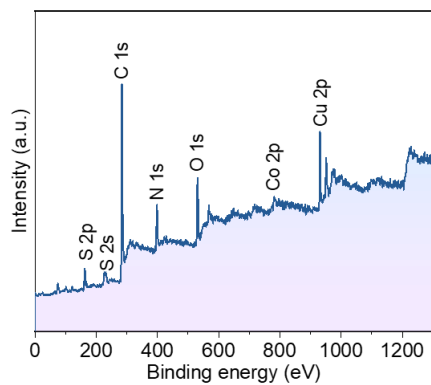

**Fig. S4** XPS survey spectrum of  $\text{Co}_3\text{S}_4/\text{Cu}_2\text{S}@\text{NC}$ .

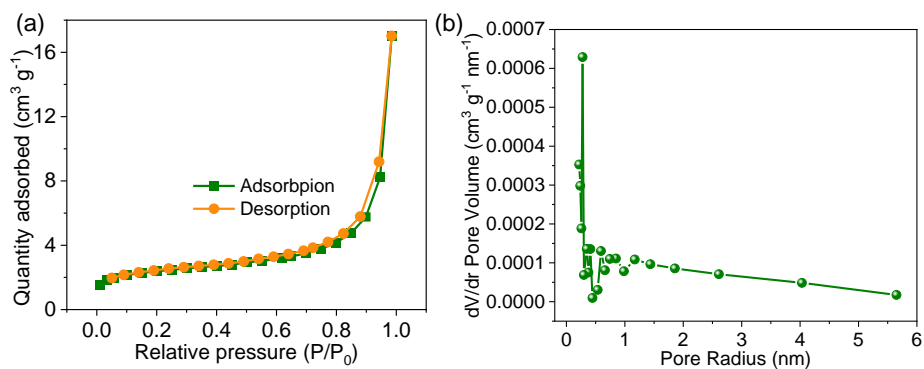

**Fig. S5** (a) The  $\text{N}_2$  adsorption-desorption isotherms of the composite. (b) The pore-size distribution.

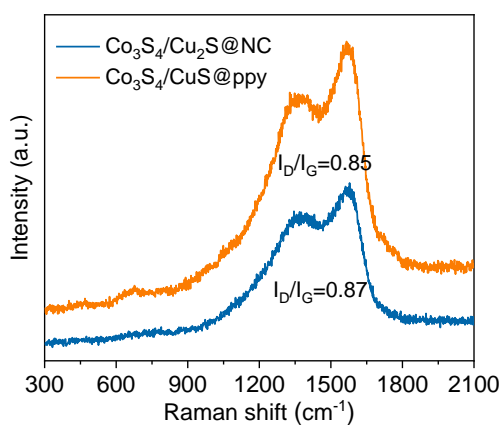

**Fig. S6** Raman spectrum of  $\text{Co}_3\text{S}_4/\text{Cu}_2\text{S}@\text{NC}$  and  $\text{Co}_3\text{S}_4/\text{CuS}@\text{PPy}$ .

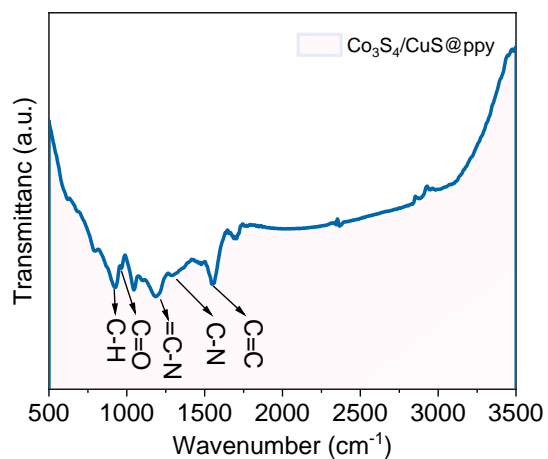

**Fig. S7** FTIR spectra of  $\text{Co}_3\text{S}_4/\text{CuS}@PPy$  hybrid.

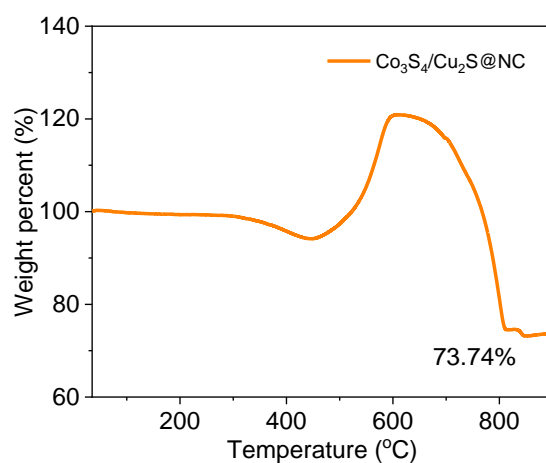

**Fig. S8** TGA curve of  $\text{Co}_3\text{S}_4/\text{Cu}_2\text{S}@NC$ .

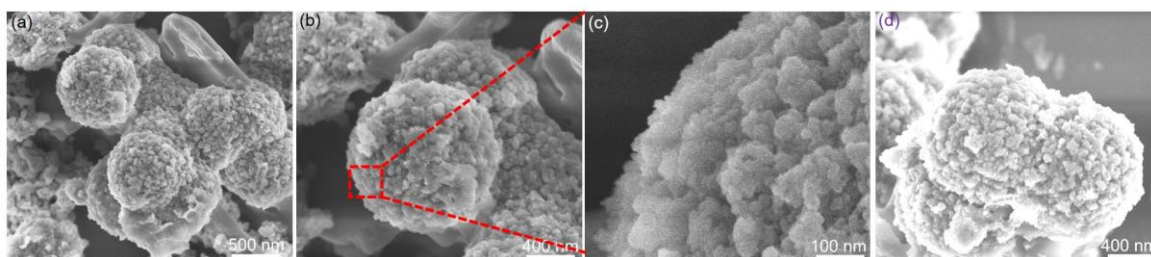

**Fig. S9** SEM images of the  $\text{Co}_3\text{S}_4/\text{Cu}_2\text{S}@NC$  after cycling (a-c) 200 times and (d) 350 times at  $1 \text{ A g}^{-1}$ .

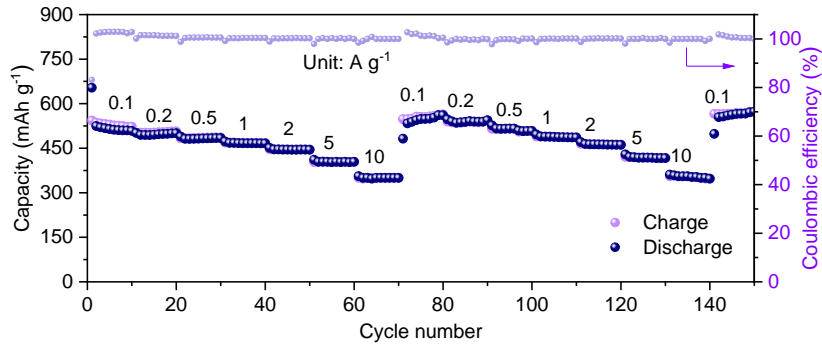

**Fig. S10** Rate-performance of Co<sub>3</sub>S<sub>4</sub>/Cu<sub>2</sub>S@NC at 0.1-10 A g<sup>-1</sup>.

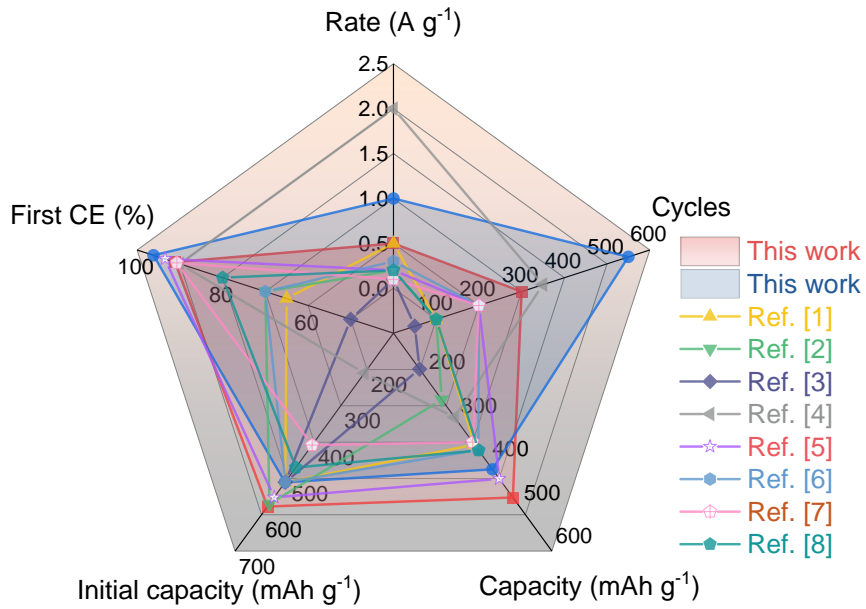

**Fig. S11** Radar graph of some reported anodes for Na-ion batteries.

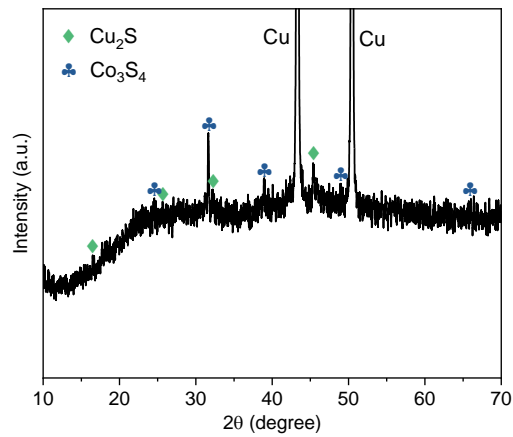

**Fig. S12** XRD pattern of Co<sub>3</sub>S<sub>4</sub>/Cu<sub>2</sub>S@NC after cycling.

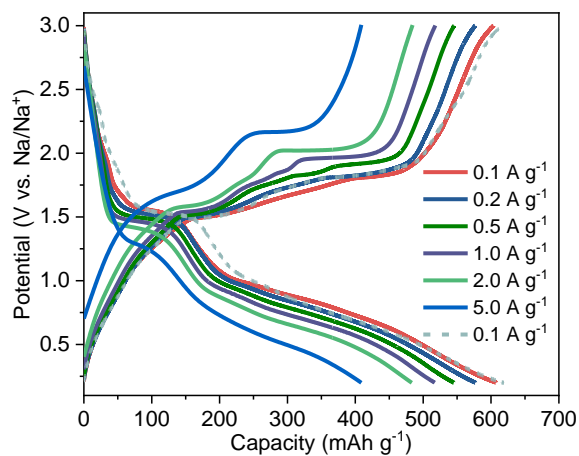

**Fig. S13** Galvanostatic discharge-charge curves of  $\text{Co}_3\text{S}_4/\text{Cu}_2\text{S}@\text{NC}$  at different current densities ( $0.1\text{--}5\text{ A g}^{-1}$ ).

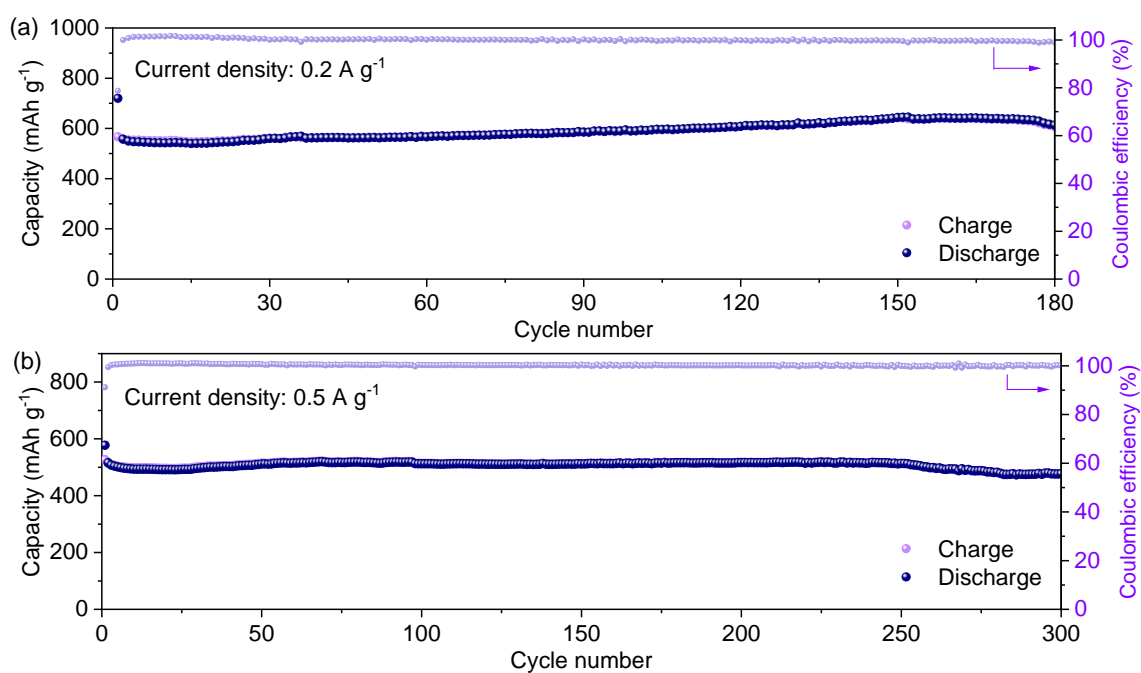

**Fig. S14** Cycling performance of  $\text{Co}_3\text{S}_4/\text{Cu}_2\text{S}@\text{NC}$  anode at (a)  $0.2$  and (b)  $0.5\text{ A g}^{-1}$ .



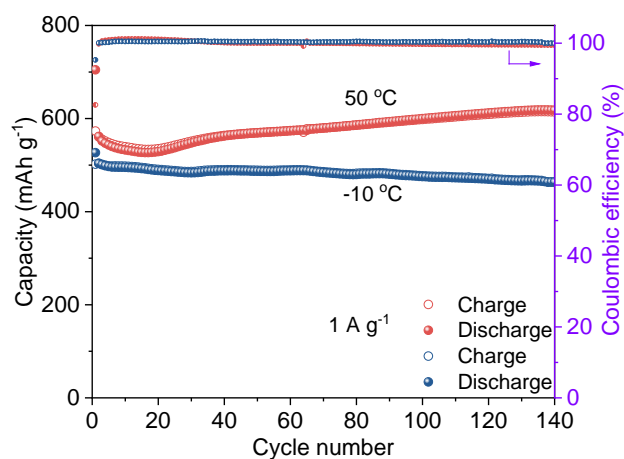

**Fig. S15** Cycling performance of the battery with the  $\text{Co}_3\text{S}_4/\text{Cu}_2\text{S}@\text{NC}$  as anode under (b)  $50\text{ }^\circ\text{C}$  and (c)  $-10\text{ }^\circ\text{C}$  at  $1.0\text{ A g}^{-1}$ .

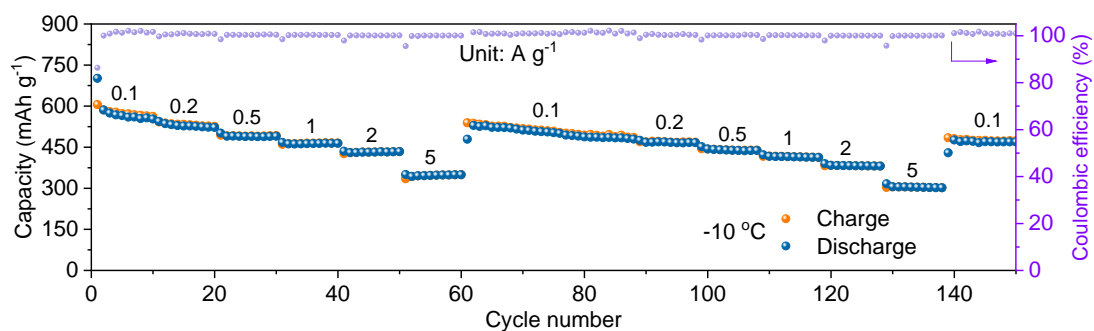

**Fig.S16** Rate-performance of the  $\text{Co}_3\text{S}_4/\text{Cu}_2\text{S}@\text{NC}$  under  $-10\text{ }^\circ\text{C}$ .

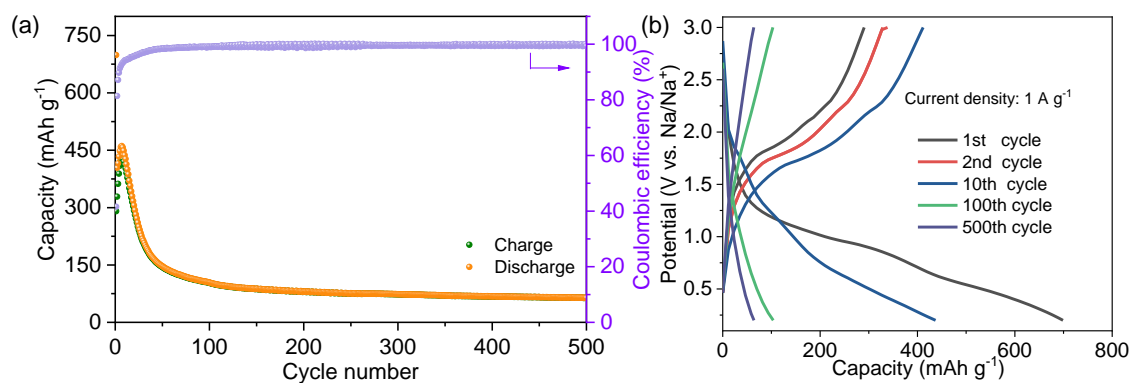

**Fig. S17** (a) Cycling performance and (b) GCD curves of the  $\text{Co}_3\text{S}_4/\text{Cu}_2\text{S}@\text{NC}$  at  $1\text{ A g}^{-1}$  in the carbonate electrolyte ( $1\text{ M NaClO}_4$  in  $\text{EC}:\text{DEC}(1:1)\text{vol}+ 5\% \text{ FEC}$ ).

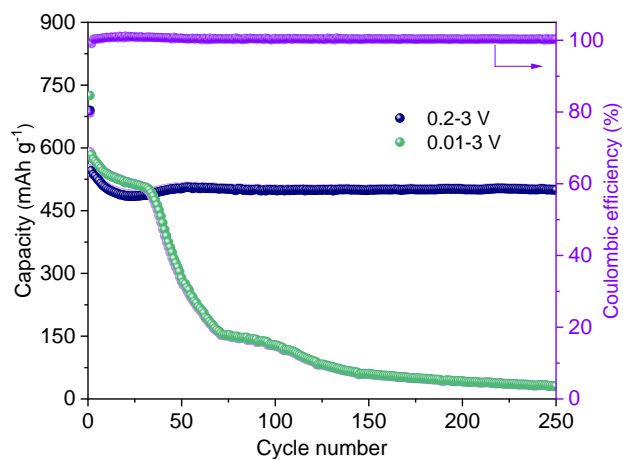

**Fig. S18** Cycling performance of  $\text{Co}_3\text{S}_4/\text{Cu}_2\text{S}@NC$  under different voltage windows at  $1.0 \text{ A g}^{-1}$ .

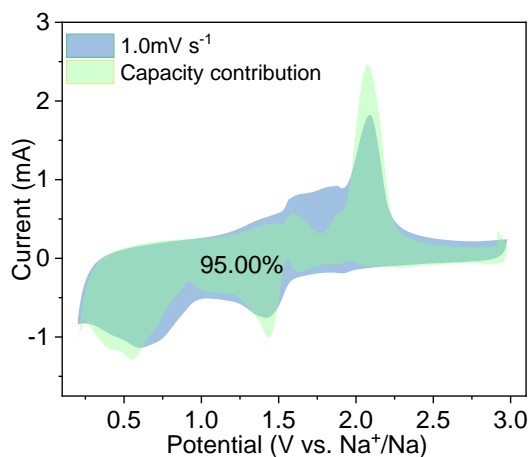

**Fig. S19** CV curve with the pseudocapacitive contribution at  $1.0 \text{ mV s}^{-1}$ .

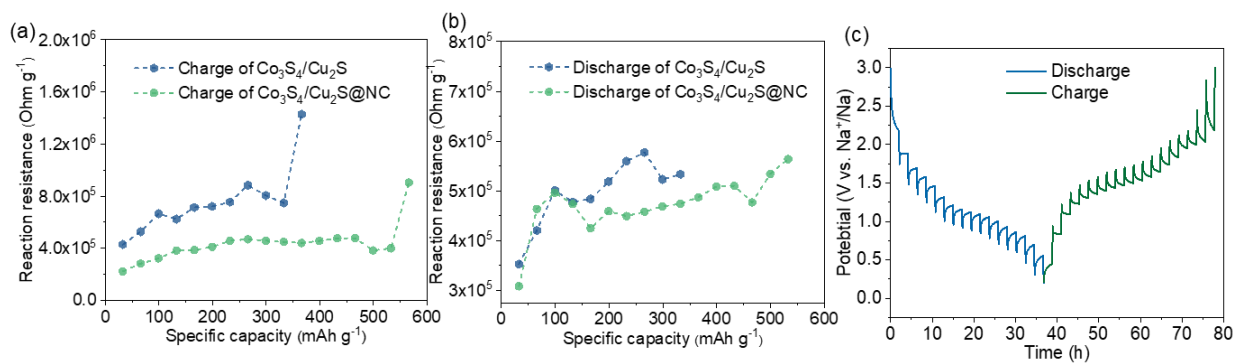

**Fig. S20** *In situ* reaction impedances of  $\text{Co}_3\text{S}_4/\text{Cu}_2\text{S}@NC$  and  $\text{Co}_3\text{S}_4/\text{Cu}_2\text{S}$  during (a) charge and (b) discharge. (c) GITT time-potential distributions of  $\text{Co}_3\text{S}_4/\text{Cu}_2\text{S}@NC$ .

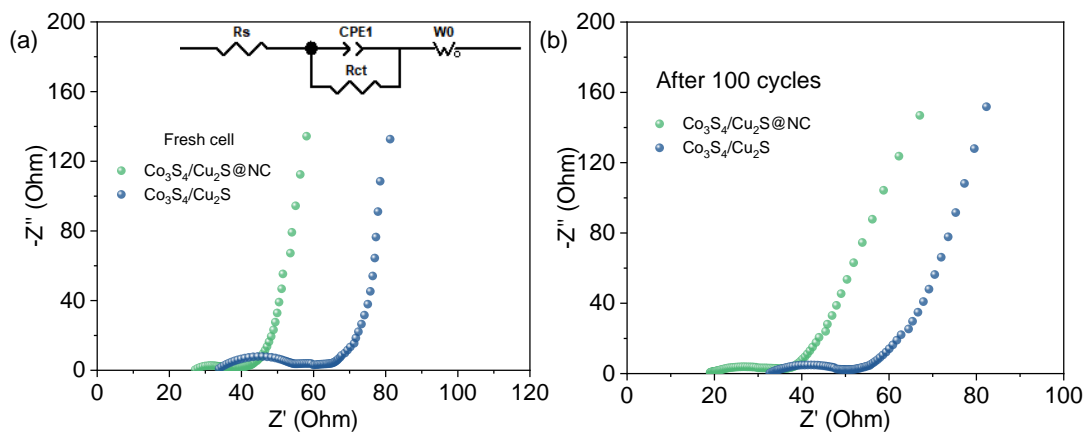

**Fig. S21** EIS spectra of the  $\text{Co}_3\text{S}_4/\text{Cu}_2\text{S}@NC$  and  $\text{Co}_3\text{S}_4/\text{Cu}_2\text{S}$  (a) before and (b) after 100 cycles at  $1 \text{ A g}^{-1}$ . The inserts display the equivalent circuits.

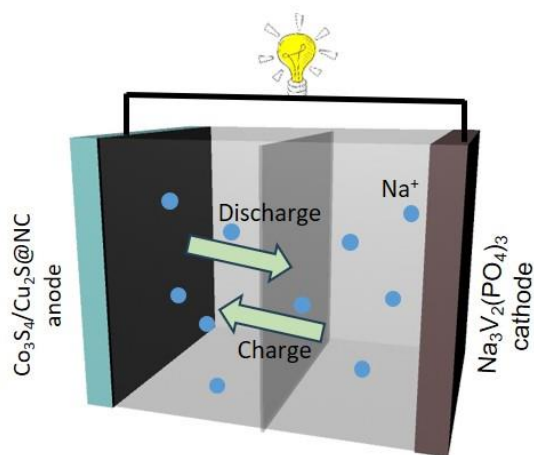

**Fig. S22** Schematic diagram of full cell assembled by  $\text{Co}_3\text{S}_4/\text{Cu}_2\text{S}@NC$  anode and NVP cathode.

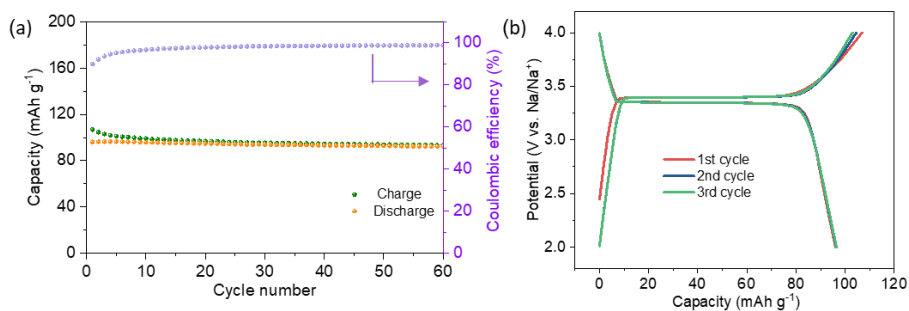

**Fig. S23** The electrochemical properties of the  $\text{Na}_3\text{V}_2(\text{PO}_4)_3$ .

**Table S1.** Comparison on the electrochemical performance of some Na-ion battery anodes.

| Anode materials                                      | Current density (A g <sup>-1</sup> ) | Capacity (mAh g <sup>-1</sup> ) | Cycle number | Ref.      |
|------------------------------------------------------|--------------------------------------|---------------------------------|--------------|-----------|
| Co <sub>3</sub> S <sub>4</sub> /Cu <sub>2</sub> S@NC | 0.5                                  | 477.1                           | 300          | This work |
|                                                      | 1.0                                  | 412.3                           | 550          |           |
| Co <sub>3</sub> S <sub>4</sub> /CNTs                 | 0.5                                  | 355.9                           | 100          | [1]       |
| Co <sub>3</sub> S <sub>4</sub> @polyaniline          | 0.2                                  | 252.5                           | 100          | [2]       |
| Cu <sub>2</sub> S@N,S dual-doped carbon matrix       | 0.1                                  | 182.3                           | 50           | [3]       |
| Cu <sub>2</sub> S/CNT                                | 2.0                                  | 293                             | 350          | [4]       |
| Cu <sub>2</sub> S@ZnS/C                              | 0.2                                  | 434                             | 200          | [5]       |
| Cu <sub>2</sub> S@carbon@MoS <sub>2</sub>            | 0.3                                  | 368                             | 200          | [6]       |
| Cu <sub>2</sub> S twin-daffodil                      | 0.1                                  | 350                             | 200          | [7]       |
| Cu <sub>2</sub> S hollow spheres                     | 0.2                                  | 369                             | 100          | [8]       |

## Reference

- 1 D. N. Liu, A. P. Hu, Y. F. Zhu, S. P. Zhou, Y. Duan, Q. L. Tang, W. N. Deng, X. H. Chen, *Ceram. Int.* 2019, **45**, 3591-3599.
- 2 Q. Zhou, L. Liu, Z. F. Huang, L. G. Yi, X. Y. Wang, G. Z. Cao, *J. Mater. Chem. A* 2016, **4**, 5505-5516.
- 3 Q. W. Chen, M. M. Ren, H. Xu, W. L. Liu, J. P. Hei, L. W. Su, L. Z. Wang, *ChemElectroChem*. 2018, **5**, 2135-2141.
- 4 J. Ren, G. Q. Ling, H. Guo, F. Zhang, W. H. Tian, P. Bai, J. Q. Han, R. P. Ren, Y. K. Lv, *J. Alloys Compd.* 2023, **953**, 170161.
- 5 B. A. Yu, Y. X. Ji, X. Hu, Y. J. Liu, J. Yuan, S. Lei, G. B. Zhong, Z. X. Weng, H. B. Zhan, Z. H. Wen, *Chem. Eng. J.* 2022, **430**, 132993.
- 6 Y. J. Fang, D. Y. Luan, Y. Chen, S. Y. Gao, *Angew Chem. Int. Ed.* 2020, **59**, 7178–7183.
- 7 T. Li, H. Wu, H. Li, S. H. Chen, D. H. Zhang, F. Xu, *Mater. Chem. Phys.* 2020, **248**, 122934.
- 8 J. B. Wang, J. Okabe, K. Urita, ;I. Moriguchi, M. D. Wei, *J. Electroanal. Chem.* 2020, **874**, 114523.
